# Supplementary material for: Psychological and demographic factors associated with fatigue and social adjustment in young people with severe chronic fatigue syndrome/myalgic encephalomyelitis: a preliminary mixed-methods study
Source: Springer Nature journal article supplement (doi:10.1007/s10865-019-00010-x), 2019-01-25
Supplement: MOESM1 [file 16422392]

Supplementary materials:

Table A1: Multiple regressions analysing the impact of time, age, gender and T1 fear avoidance beliefs on the key study outcomes.

|  | *b* | *SE b* | β | *t* | *p* |
| --- | --- | --- | --- | --- | --- |
| Outcome: social adjustment at T2 |  |  |  |  |  |
| Model 1 |  |  |  |  |  |
| Age | 0.48 | 0.53 | 0.17 | 0.89 | .191 |
| Gender | 7.81 | 5.78 | 0.24 | 1.35 | .094 |
| Fear avoidance beliefs | 0.73 | 0.47 | 0.29 | 1.54 | .068 |
| Model 2 |  |  |  |  |  |
| Age | 0.68 | 0.60 | 0.24 | 1.14 | .134 |
| Gender | 7.30 | 5.86 | 0.23 | 1.25 | .113 |
| Fear avoidance | 0.78 | 0.48 | 0.32 | 1.63 | .059 |
| Time | 1.23 | 1.57 | 0.16 | 0.78 | .222 |
|  |  |  |  |  |  |
| Outcome: work/school attendance at T2 |  |  |  |  |  |
| Model 1 |  |  |  |  |  |
| Age | -1.89 | 1.81 | -.20 | -1.05 | .154 |
| Gender | -83.77 | 31.77 | -.52 | -2.64 | .008 |
| Fear avoidance beliefs | -.06 | 1.68 | -.01 | -0.03 | .487 |
| Model 2 |  |  |  |  |  |
| Age | -1.86 | 2.02 | -0.20 | -0.92 | .185 |
| Gender | -84.10 | 33.45 | -0.52 | -2.51 | .011 |
| Fear avoidance | -0.04 | 1.77 | -0.00 | -0.02 | .492 |
| Time | 0.23 | 5.38 | 0.01 | 0.04 | .483 |
|  |  |  |  |  |  |
| Outcome: fatigue at T2 |  |  |  |  |  |
| *Model 1* |  |  |  |  |  |
| Age | 0.04 | 0.36 | .02 | 0.11 | .459 |
| Gender | 4.07 | 3.95 | .20 | 1.03 | .156 |
| Fear avoidance beliefs | -0.18 | 0.32 | -.12 | -0.56 | .292 |
| *Model 2* |  |  |  |  |  |
| Age | 0.17 | 0.41 | 0.10 | .41 | .345 |
| Gender | 3.75 | 4.01 | 0.19 | .93 | .180 |
| Fear avoidance | -0.14 | 0.33 | -.09 | -.43 | .334 |
| Time | 0.78 | 1.08 | 0.17 | .72 | .239 |

**p*<.05
